# Supplementary material for: Birth Weight and the Risk of Cardiovascular Outcomes: A Report From the Large Population-Based UK Biobank Cohort Study
Source: Frontiers journal article supplement (doi:10.3389/fcvm.2022.827491), 2022-03-24
Supplement: Data_Sheet_1.pdf [file Data_Sheet_1.pdf]

## Supplementary Materials

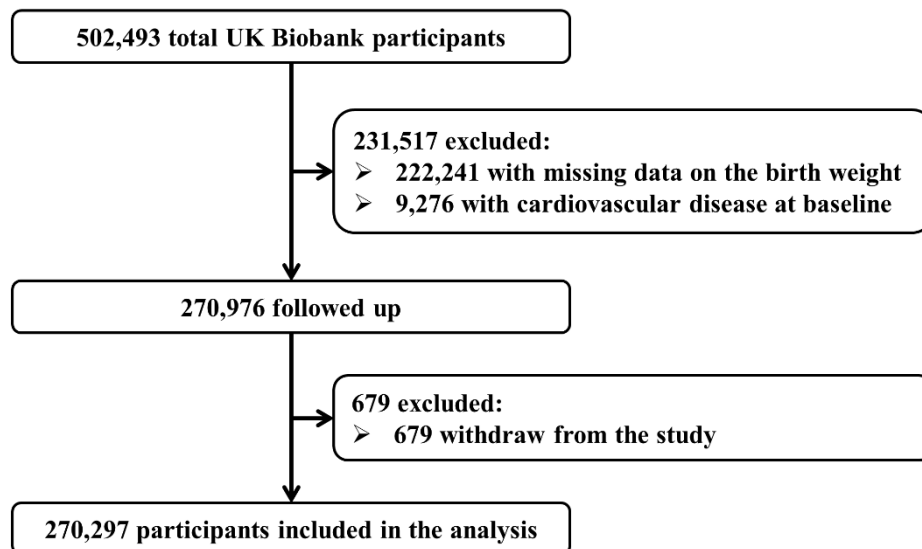

**Supplementary Figure 1** Flow chart of participant selection in this study

**Supplementary Table 1 Baseline characteristics of participants in UK biobank excluded from our analysis**

| Characteristics                        | Participants excluded |
|----------------------------------------|-----------------------|
| N                                      | 232196                |
| Age, years                             | 58.28 (7.74)          |
| Male                                   | 126014 (54.3)         |
| Ethnicity                              |                       |
| White                                  | 211296 (91.0)         |
| Others                                 | 18996 (8.2)           |
| Townsend Deprivation Index             | -1.07 (3.30)          |
| Qualification                          |                       |
| Degree                                 | 68191 (29.4)          |
| No degree                              | 158422 (68.2)         |
| Body mass index, kg/m <sup>2</sup>     | 27.67 (4.73)          |
| Physical activity, MET-min/week        |                       |
| < 500                                  | 98235 (42.3)          |
| ≥ 500                                  | 82999 (35.7)          |
| Smoking                                |                       |
| Never                                  | 119481 (51.5)         |
| Former                                 | 84611 (36.4)          |
| Current                                | 26111 (11.2)          |
| Drinking                               |                       |
| Never                                  | 12783 (5.5)           |
| Former                                 | 9337 (4.0)            |
| Current                                | 208821 (89.9)         |
| Vegetable consumption, tablespoons/day |                       |
| < 2.0                                  | 14596 (6.3)           |
| 2.0-3.9                                | 66673 (28.7)          |
| ≥ 4.0                                  | 150186 (64.7)         |
| Fruit consumption, pieces/day          |                       |
| < 2.0                                  | 67214 (28.9)          |
| 2.0-3.9                                | 92280 (39.7)          |
| ≥ 4.0                                  | 71960 (31.0)          |
| Early life exposure                    |                       |
| Maternal smoking                       | 57104 (24.6)          |
| Breastfed as a baby                    | 109041 (47.0)         |
| Part of multiple birth                 | 3840 (1.7)            |
| Supplement and medication use          |                       |
| Vitamin                                | 70078 (30.2)          |

|                                       |               |
|---------------------------------------|---------------|
| Mineral and other dietary supplements | 98523 (42.4)  |
| Aspirin                               | 47131 (20.3)  |
| Non-aspirin NSAIDs                    | 73419 (31.6)  |
| Health conditions                     |               |
| Hypertension                          | 136951 (59.0) |
| Diabetes                              | 16156 (7.0)   |
| Dyslipidemia                          | 154830 (66.7) |

Values are presented as means (SD) for continuous variables and as number (%) for categorical variables.

Abbreviations: NSAID, non-steroidal anti-inflammatory drug.

**Supplementary Table 2 Associations between birth weight and risk of CVD mortality by stroke, myocardial infarction and CHD**

| Outcomes                             | Normal | Low | Model 2‡            |                    | High | Model 2‡            |                    |
|--------------------------------------|--------|-----|---------------------|--------------------|------|---------------------|--------------------|
|                                      | BW     | BW  | HR (95% CI)         | P <sub>value</sub> | BW   | HR (95% CI)         | P <sub>value</sub> |
| Mortality from stroke                | 173    | 9   | 1.17 (0.50 to 2.70) | 0.72               | 33   | 1.02 (0.65 to 1.58) | 0.94               |
| Ischemic stroke                      | 17     | 0   | -                   | -                  | 4    | 0.54 (0.12 to 2.38) | 0.42               |
| Hemorrhagic stroke                   | 111    | 7   | 1.47 (0.57 to 3.75) | 0.42               | 24   | 1.42 (0.86 to 2.37) | 0.17               |
| Mortality from myocardial infarction | 186    | 9   | 0.93 (0.37 to 2.33) | 0.88               | 40   | 0.85 (0.55 to 1.30) | 0.45               |
| Mortality from CHD                   | 478    | 25  | 1.12 (0.65 to 1.94) | 0.68               | 107  | 0.87 (0.66 to 1.15) | 0.33               |

Abbreviations: CHD, coronary heart disease; BW, birth weight; HR, hazard ratio; CI, confidence interval.

‡Model 2: adjusted for age, sex, ethnicity, TDI, education, BMI, physical activity, smoking status, alcohol consumption, vegetable and fruit consumptions, maternal smoking, breastfed as a baby, part of multiple birth, aspirin use, non-aspirin NSAID use, vitamin, mineral and other dietary supplement use, hypertension, diabetes, dyslipidemia.
